# Supplementary material for: A desulfurization fuel cell with alkali and sulfuric acid byproducts: a prototype and a model
Source: Royal Society of Chemistry journal article supplement (doi:10.1039/d1se00659b), 2021-01-01
Supplement: d1se00659b1.pdf [file d1se00659b1.pdf]

## A desulfurization fuel cell with alkali and sulfuric acid byproducts: prototype and model

Jucai Wei, Yueyuan Gu, Xu Wu\*

*School of Environmental Science and Engineering, Huazhong University of Science and Technology, Wuhan 430074, China*

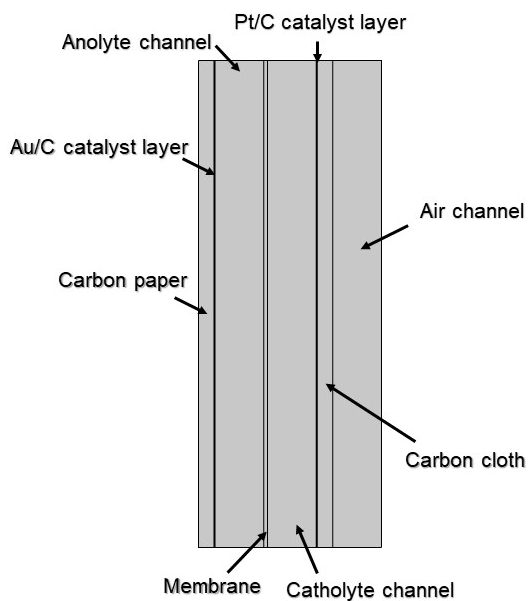

**Figure S1 Schematic of 2-D numerical model**

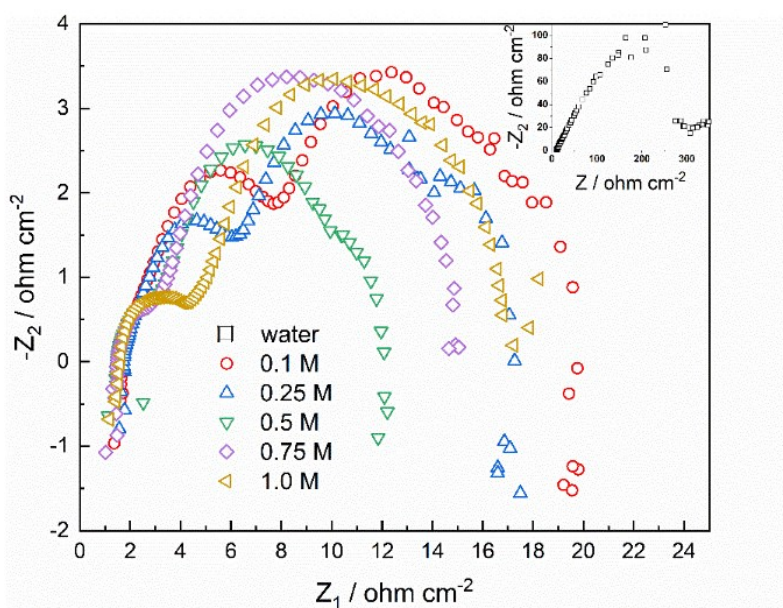

**Figure S2 Nyquist plots of the sulfite/air fuel cell with different NaOH concentrations**

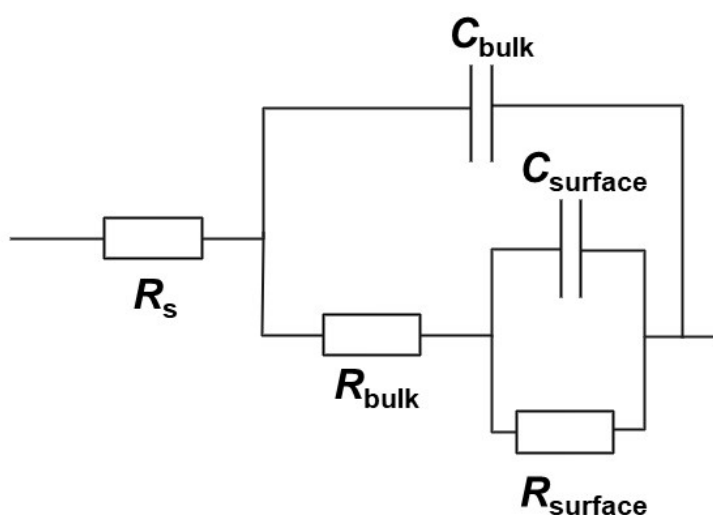

*Figure S3 Equivalent circuit of EIS tests*

*Table S1 The EIS calculation results of the sulfite/air fuel cell with different NaOH concentrations based on the equivalent circuit*

| $c(\text{NaOH}) / \text{mol L}^{-1}$ | $R_s / \Omega$ | $R_{\text{bulk}} / \Omega$ | $C_{\text{bulk}} / \text{F}$ | $R_{\text{surface}} / \Omega$ | $C_{\text{surface}} / \text{F}$ |
|--------------------------------------|----------------|----------------------------|------------------------------|-------------------------------|---------------------------------|
| 1                                    |                |                            |                              |                               |                                 |
| 0                                    | 2.80           | 269.30                     | $1.14 \times 10^{-5}$        | 444.70                        | $1.48 \times 10^{-4}$           |
| 0.1                                  | 2.23           | 6.51                       | $7.28 \times 10^{-5}$        | 9.39                          | $6.45 \times 10^{-3}$           |
| 0.25                                 | 2.15           | 5.08                       | $8.18 \times 10^{-5}$        | 8.37                          | $6.91 \times 10^{-3}$           |
| 0.5                                  | 1.81           | 2.73                       | $3.01 \times 10^{-4}$        | 6.46                          | $6.85 \times 10^{-3}$           |
| 0.75                                 | 2.15           | 6.32                       | $1.82 \times 10^{-5}$        | 5.94                          | $2.69 \times 10^{-3}$           |
| 1.0                                  | 2.30           | 6.69                       | $3.63 \times 10^{-5}$        | 1.02                          | $6.67 \times 10^{-3}$           |

**Table S2 The EIS calculation results of the sulfite/air fuel cell with different  $\text{Na}_2\text{SO}_3$  concentrations based on the equivalent circuit**

| $c(\text{Na}_2\text{SO}_3) / \text{mol L}^{-1}$ | $R_s / \Omega$ | $R_{\text{bulk}} / \Omega$ | $C_{\text{bulk}} / \text{F}$ | $R_{\text{surface}} / \Omega$ | $C_{\text{surface}} / \text{F}$ |
|-------------------------------------------------|----------------|----------------------------|------------------------------|-------------------------------|---------------------------------|
| 0.1                                             | 5.76           | 136.70                     | $2.31 \times 10^{-3}$        | 464.80                        | $9.04 \times 10^{-3}$           |
| 0.5                                             | 2.94           | 15.10                      | $1.64 \times 10^{-3}$        | 33.27                         | $3.92 \times 10^{-2}$           |
| 1.0                                             | 2.47           | 10.25                      | $1.34 \times 10^{-3}$        | 10.07                         | $4.52 \times 10^{-2}$           |
| 1.5                                             | 2.08           | 6.28                       | $7.41 \times 10^{-4}$        | 7.57                          | $2.19 \times 10^{-2}$           |
| 2.0                                             | 2.06           | 6.13                       | $7.99 \times 10^{-4}$        | 6.97                          | $2.26 \times 10^{-2}$           |

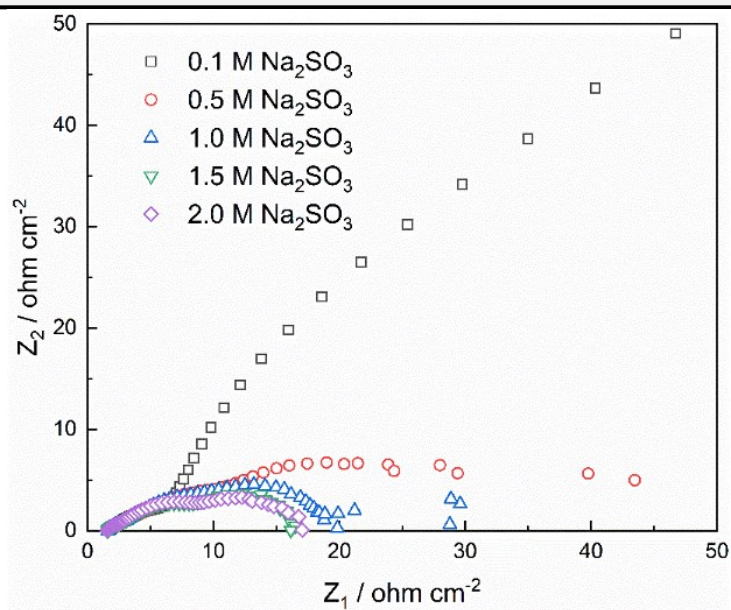

**Figure S4 Nyquist plots of the sulfite/air fuel cell with different  $\text{Na}_2\text{SO}_3$  concentrations**

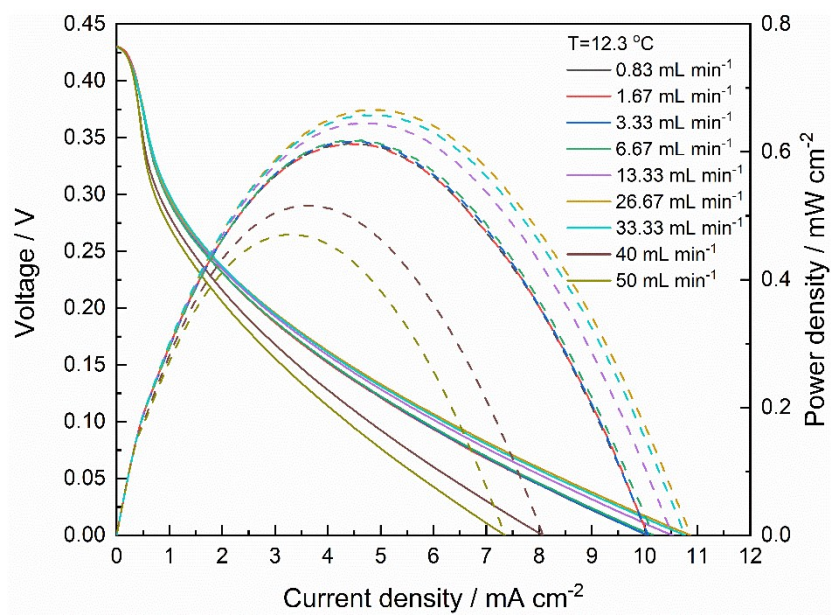

**Figure S5** Effects of catholyte flow rate on the performances of the sulfite/air fuel cell
